# Supplementary material for: A Stakeholder-Engaged Process to Design and Implement the Assessment of Cognitive Complaints Toolkit for Alzheimer’s Disease (ACCT-AD) in Primary Care
Source: Research Square preprint supplement (doi:10.21203/rs.3.rs-7134103/v1), 2025-07-29
Supplement: Supplementary file 1 [file 4dfac74148c28fa9cc622d35.docx]

Focus Group or Feedback Session Guide

1. What is working well when using the Toolkit?
2. What has been most challenging about using the Toolkit?
3. Strategies for success using the Toolkit?
4. Perceived impact on patient care and patient experience?
5. Most important knowledge gained from participation in Case Review Conferences?
6. How has using the Toolkit has changed your practice- both individually and as a group??
7. What kind of training is needed to use the Toolkit?
8. What clinic infrastructure is required to make the Toolkit work?
